# Supplementary material for: Associations of n-3, n-6 Fatty Acids Intakes and n-6:n-3 Ratio with the Risk of Depressive Symptoms: NHANES 2009–2016
Source: PubMed Central journal article supplement (PMC7019726; doi:10.3390/nu12010240), 2020-01-16
Supplement: nutrients-12-00240-s001.pdf [file nutrients-12-00240-s001.pdf]

**Supplementary Table 1.** The classifications of categorical covariates.

| Covariates                                    | classifications              |                                           |                       |                     |            |
|-----------------------------------------------|------------------------------|-------------------------------------------|-----------------------|---------------------|------------|
| <b>Age group</b>                              | 18-44 years,                 | 44-59 years,                              | ≥60years              |                     |            |
| <b>Gender</b>                                 | Male,                        | Female                                    |                       |                     |            |
| <b>Race</b>                                   | Mexican American,            | Other Hispanic,                           | Non-Hispanic White,   | Non-Hispanic Black, | Other race |
| <b>Marital status</b>                         | Married/Living with partner, | Windowed/divorced/separated/Never married |                       |                     |            |
| <b>Educational level</b>                      | Below high school            | High school,                              | Above high school     |                     |            |
| <b>Household income</b>                       | <\$20000,                    | \$20000-\$44999,                          | \$50000-\$74999,      | ≥75000              |            |
| <b>Body mass index</b>                        | < 25 kg/m <sup>2</sup> ,     | 25 to <30 kg/m <sup>2</sup> ,             | ≥30 kg/m <sup>2</sup> |                     |            |
| <b>Work activity</b>                          | Vigorous activity,           | Moderate activity,                        | other                 |                     |            |
| <b>Recreation activity</b>                    | Vigorous activity,           | Moderate activity,                        | other                 |                     |            |
| <b>Smoking at least 100cigarettes in life</b> | Yes,                         | No                                        |                       |                     |            |
| <b>Have at least 12 alcohol drinks/years</b>  | Yes,                         | No                                        |                       |                     |            |
| <b>Hypertension</b>                           | Yes,                         | No                                        |                       |                     |            |
| <b>Diabetes</b>                               | Yes,                         | No                                        |                       |                     |            |
| <b>Coronary heart disease</b>                 | Yes,                         | No                                        |                       |                     |            |
